# Supplementary material for: Whole Goat Milk-Based Formula versus Whey-Based Cow Milk Formula: What Formula Do Infants Enjoy More?—A Feasibility, Double-Blind, Randomized Controlled Trial
Source: MDPI journal article supplement (doi:10.3390/nu15184057), 2023-09-19
Supplement: s1 [file s1]

Table S1

| Nutrient                          | Unit                          | GMF (Capricare)             | CMF                    |
|-----------------------------------|-------------------------------|-----------------------------|------------------------|
|                                   |                               | per 100 mL of prepared feed | per 100 mL of prepared |
| <b>Energy</b>                     | <b>kJ</b>                     | <b>280</b>                  | <b>280</b>             |
|                                   | <b>kcal</b>                   | <b>67</b>                   | <b>67</b>              |
| <b>Protein</b>                    | <b>g</b>                      | <b>1.3</b>                  | <b>1.3</b>             |
| Whey: casein ratio                |                               | 20:80                       | 60:40                  |
| <b>Carbohydrate</b>               | <b>g</b>                      | <b>7.6</b>                  | <b>7.6</b>             |
| Of which lactose                  | <b>g</b>                      | <b>7.6</b>                  | <b>7.6</b>             |
| <b>Fat</b>                        | <b>g</b>                      | <b>3.5</b>                  | <b>3.5</b>             |
| Milk fat                          | <b>%</b>                      | <b>48</b>                   | <b>22</b>              |
| <b>Docosahexaenoic acid (DHA)</b> | <b>mg</b>                     | <b>9.4</b>                  | <b>9.4</b>             |
| <b>Arachidonic acid (AA)</b>      | <b>mg</b>                     | <b>10</b>                   | <b>10</b>              |
| <b>Vitamins</b>                   |                               |                             |                        |
| Vitamin A                         | $\mu\text{g-RE}$              | 71                          | 71                     |
| Vitamin D <sub>3</sub>            | $\mu\text{g}$                 | 1                           | 1                      |
| Vitamin E                         | $\text{mg } \alpha\text{-TE}$ | 1.6                         | 1.6                    |
| Vitamin K <sub>1</sub>            | $\mu\text{g}$                 | 6.9                         | 6.9                    |
| Vitamin C                         | <b>mg</b>                     | <b>14</b>                   | <b>14</b>              |
| Vitamin B <sub>1</sub>            | <b>mg</b>                     | <b>0.06</b>                 | <b>0.06</b>            |
| Vitamin B <sub>2</sub>            | <b>mg</b>                     | <b>0.13</b>                 | <b>0.13</b>            |
| Niacin                            | <b>mg</b>                     | <b>0.7</b>                  | <b>0.7</b>             |
| Vitamin B <sub>6</sub>            | $\mu\text{g}$                 | 0.04                        | 0.04                   |
| Folic acid                        | $\mu\text{g}$                 | 8.8                         | 8.8                    |
| Pantothenic acid                  | <b>mg</b>                     | <b>0.36</b>                 | <b>0.36</b>            |
| Vitamin B <sub>12</sub>           | $\mu\text{g}$                 | 0.18                        | 0.18                   |
| Biotin                            | $\mu\text{g}$                 | 2.4                         | 2.4                    |
| <b>Minerals</b>                   |                               |                             |                        |
| Sodium                            | <b>mg</b>                     | <b>18</b>                   | <b>18</b>              |
| Potassium                         | <b>mg</b>                     | <b>75</b>                   | <b>75</b>              |
| Chloride                          | <b>mg</b>                     | <b>70</b>                   | <b>70</b>              |
| Calcium                           | <b>mg</b>                     | <b>66</b>                   | <b>66</b>              |
| Phosphorus                        | <b>mg</b>                     | <b>43</b>                   | <b>43</b>              |
| Magnesium                         | <b>mg</b>                     | <b>6.1</b>                  | <b>6.1</b>             |
| Iron                              | <b>mg</b>                     | <b>0.72</b>                 | <b>0.72</b>            |
| Zinc                              | <b>mg</b>                     | <b>0.5</b>                  | <b>0.5</b>             |
| Copper                            | <b>mg</b>                     | <b>0.05</b>                 | <b>0.05</b>            |
| Manganese                         | <b>mg</b>                     | <b>0.01</b>                 | <b>0.01</b>            |
| Fluoride                          | $\mu\text{g}$                 | 6.5                         | 6.5                    |
| Selenium                          | $\mu\text{g}$                 | 1.3                         | 1.3                    |
| Iodine                            | $\mu\text{g}$                 | 8.3                         | 8.3                    |
| <b>Other nutrients</b>            |                               |                             |                        |
| Choline                           | <b>mg</b>                     | <b>13</b>                   | <b>13</b>              |
| Taurine                           | <b>mg</b>                     | <b>4.7</b>                  | <b>4.7</b>             |
| Carnitine                         | <b>mg</b>                     | <b>0.92</b>                 | <b>0.92</b>            |
| Inositol                          | <b>mg</b>                     | <b>4</b>                    | <b>4</b>               |

### Table S2

[illegible]
